# Supplementary material
Source: PubMed Central journal article supplement (PMC3192309)

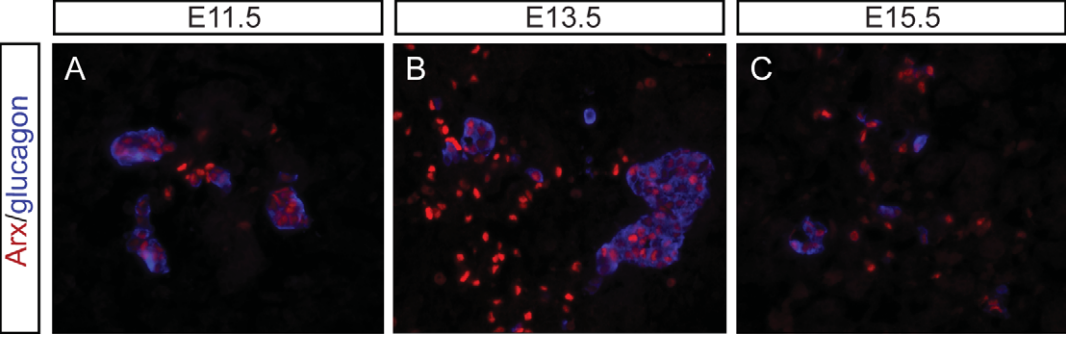

Supplement: NIHMS318685-supplement-02.pdf [file NIHMS318685-supplement-02.pdf]

**A**  
Glucagon expression

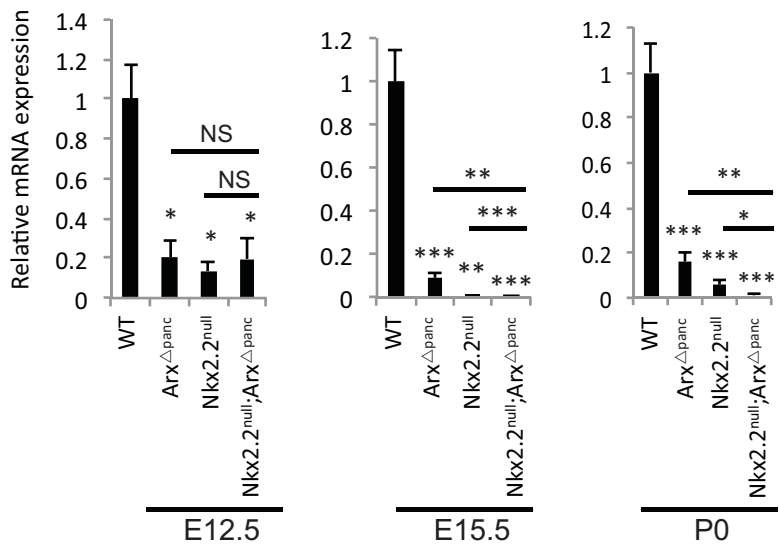

**B**  
Insulin expression

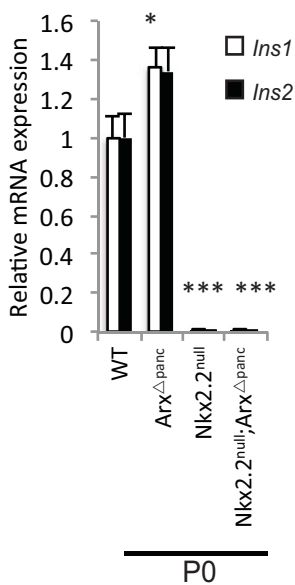

Supplement: NIHMS318685-supplement-03.pdf [file NIHMS318685-supplement-03.pdf]

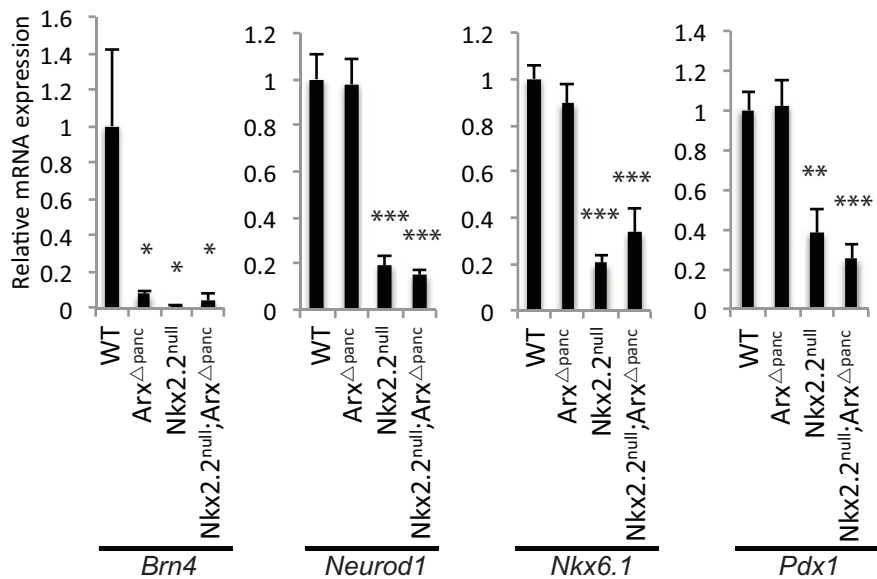

Supplement: NIHMS318685-supplement-04.pdf [file NIHMS318685-supplement-04.pdf]

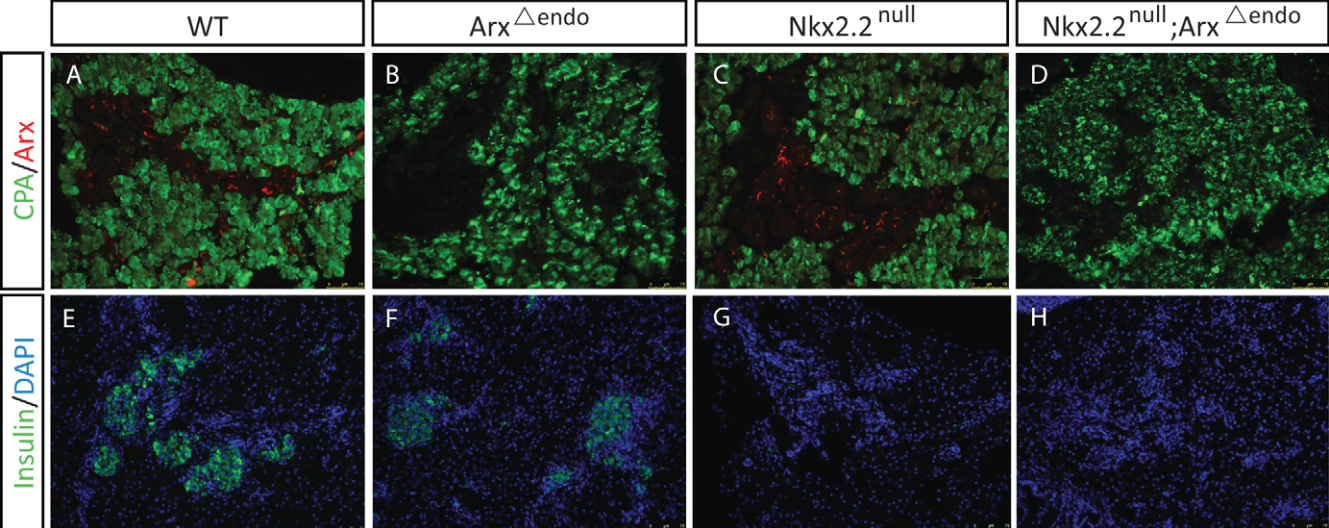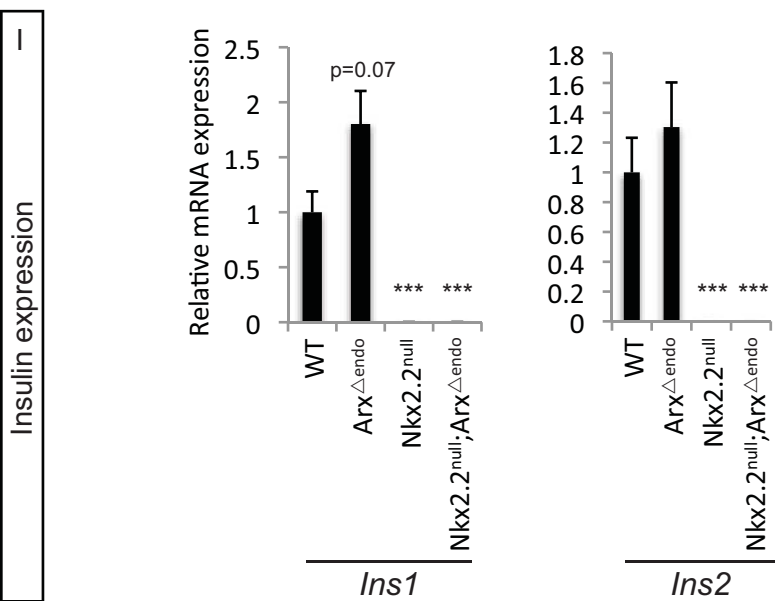

Supplement: NIHMS318685-supplement-05.pdf [file NIHMS318685-supplement-05.pdf]
